# Supplementary material
Source: MDPI journal article supplement (https://www.mdpi.com/2673-4583/5/1/2)
Supplement: s1 [file s1]

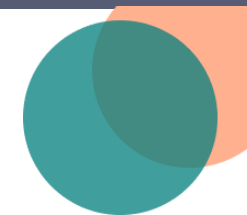

# Carbon Dots as a Fluorescence pH Nanosensor by Application of an Active Surface Preservation Strategy

Ana Carolina P. Afonso, Luís Pinto da Silva

[up201207846@edu.fc.up.pt](mailto:up201207846@edu.fc.up.pt)

**CSAC**  
**2021**

**1st International Electronic  
Conference on Chemical Sensors  
and Analytical Chemistry**

**01-15 July 2021**

# pH monitorization

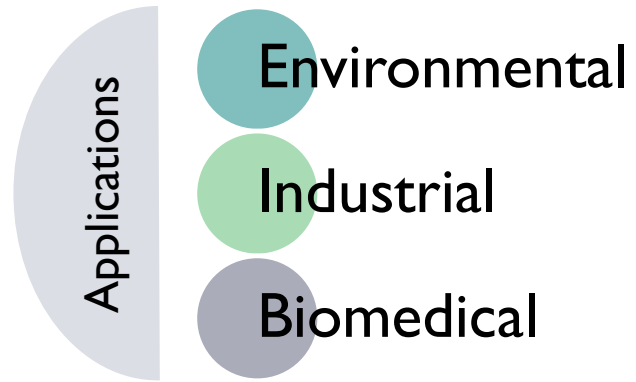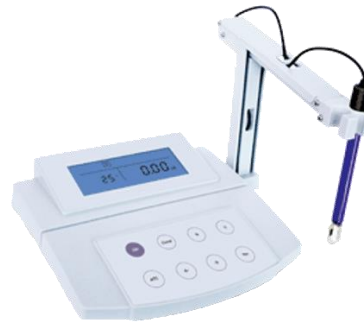

- ✗ Temperature-dependent response
- ✗ Rigid design
- ✗ Fragility

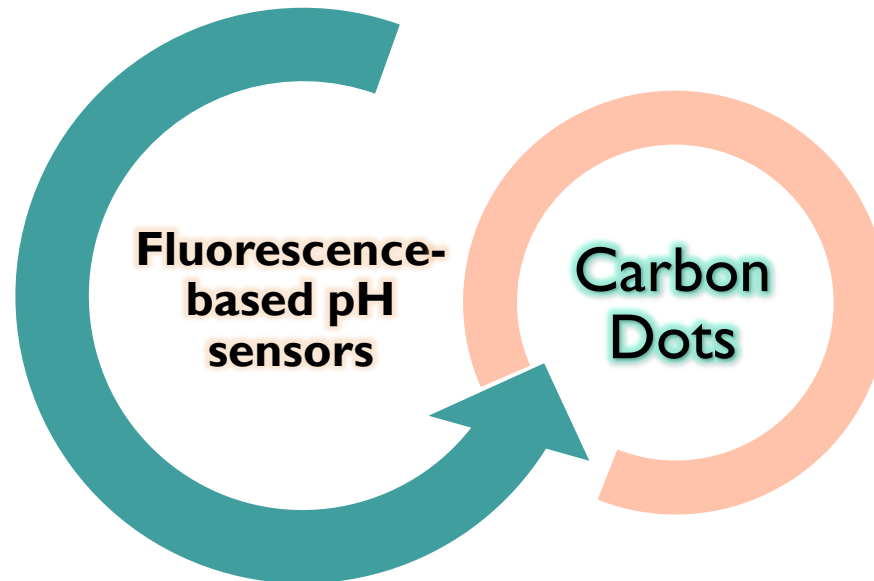

# Carbon Dots

## Carbon Based Fluorescent Nanoparticles

### *Advantages*

- ✓ High photoluminescence
- ✓ High aqueous solubility
- ✓ Low cost
- ✓ Low toxicity
- ✓ Good biocompatibility

### *Challenges so far*

- ✗ Arbitrary target analytes
- ✗ Intricate post-synthesis functionalization steps
- ✗ Limited range of pH
- ✗ Interfering potentials in complex media

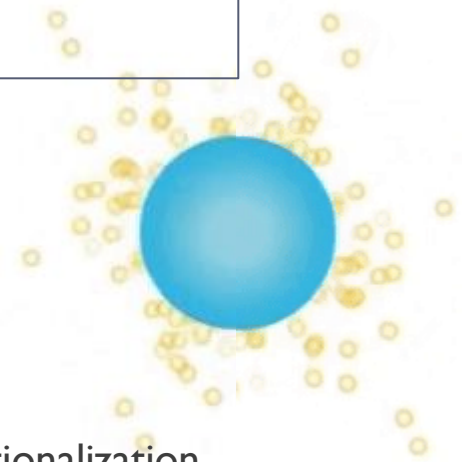

# ASP Strategy Synthesis

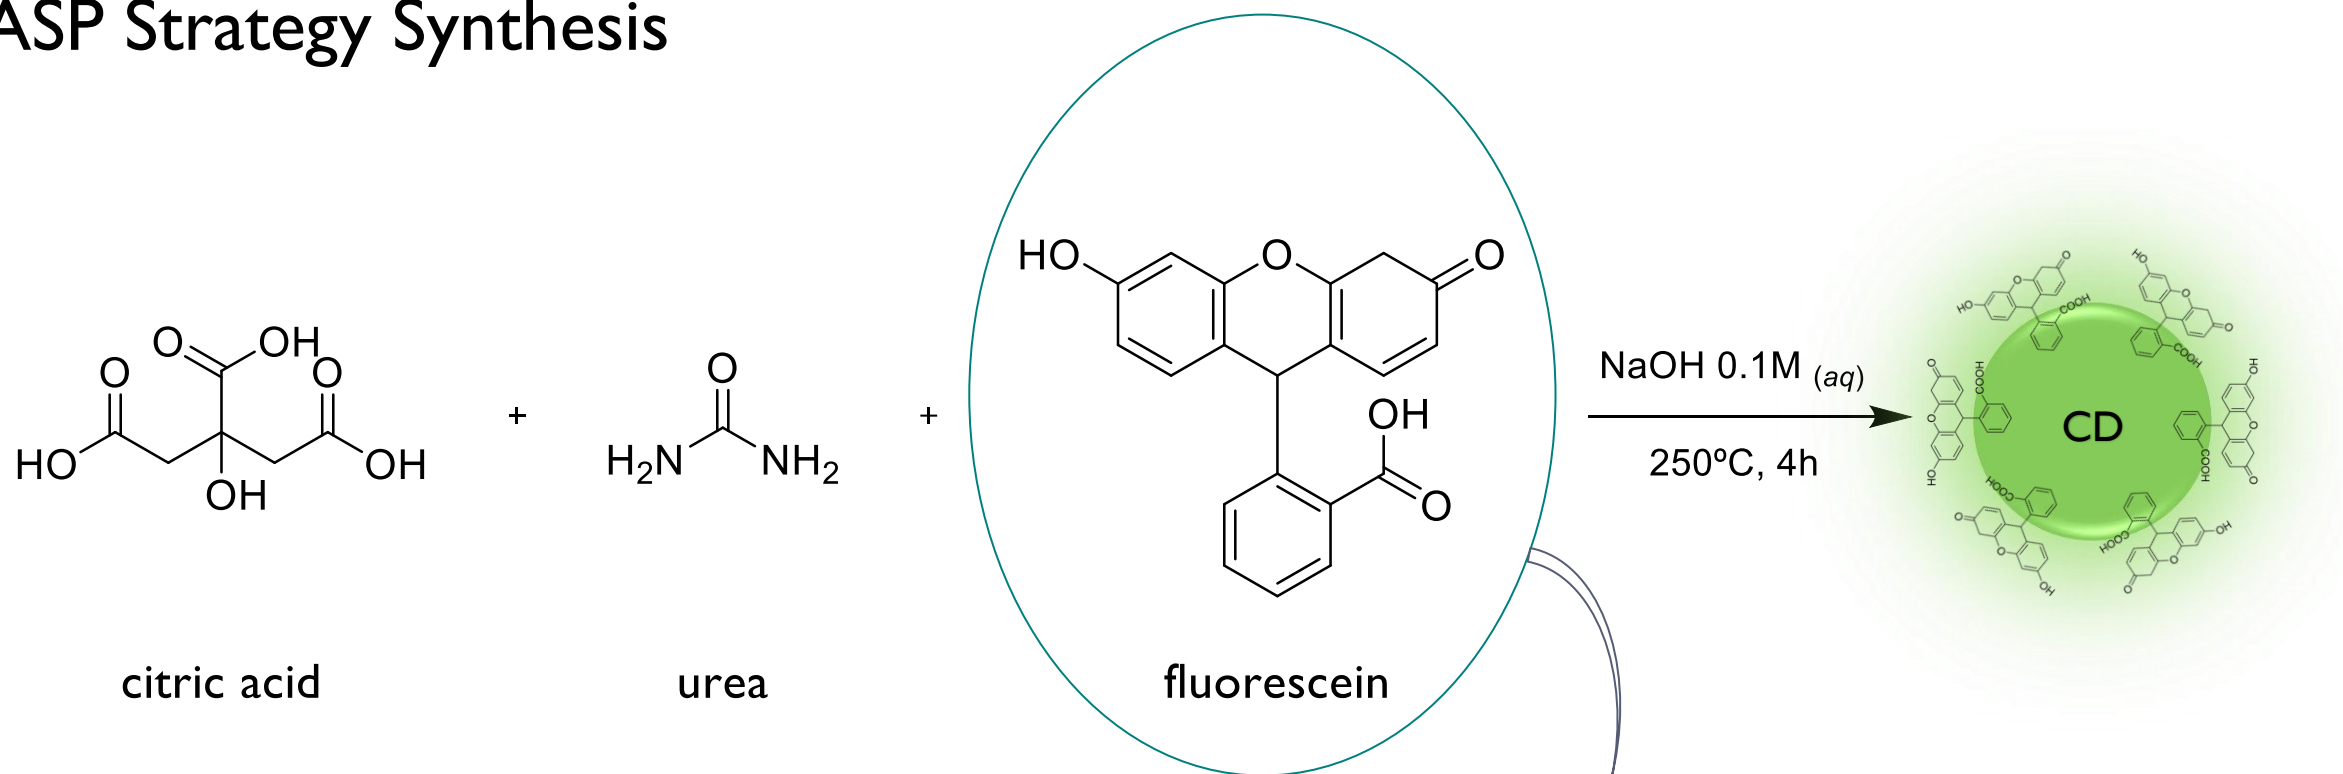

## Active Surface Preservation (ASP) Strategy

- Development of **CDs with fluorescein-like structures** preserved on their surface

# For Comparison Effect

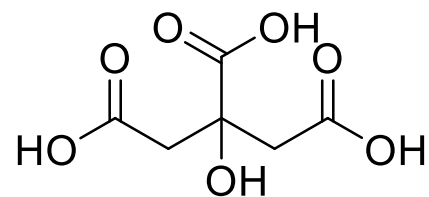

citric acid

+

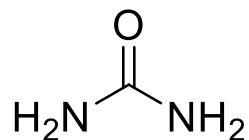

urea

+

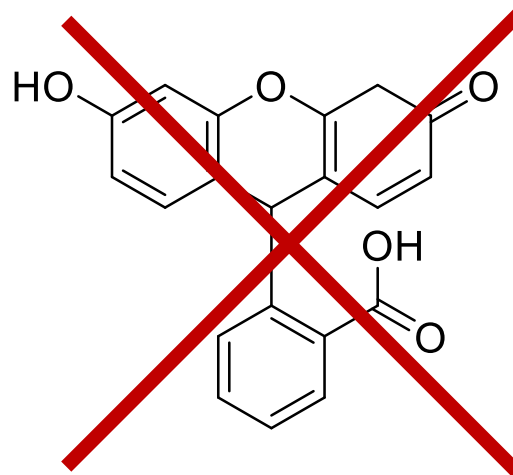

fluorescein

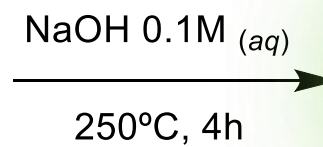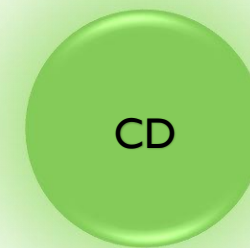

***CD without Fluorescein***

# Morphological Characterization

## CDs without Fluorescein

- Carbonaceous amorphous structure
- Mean diameter of 2.5nm

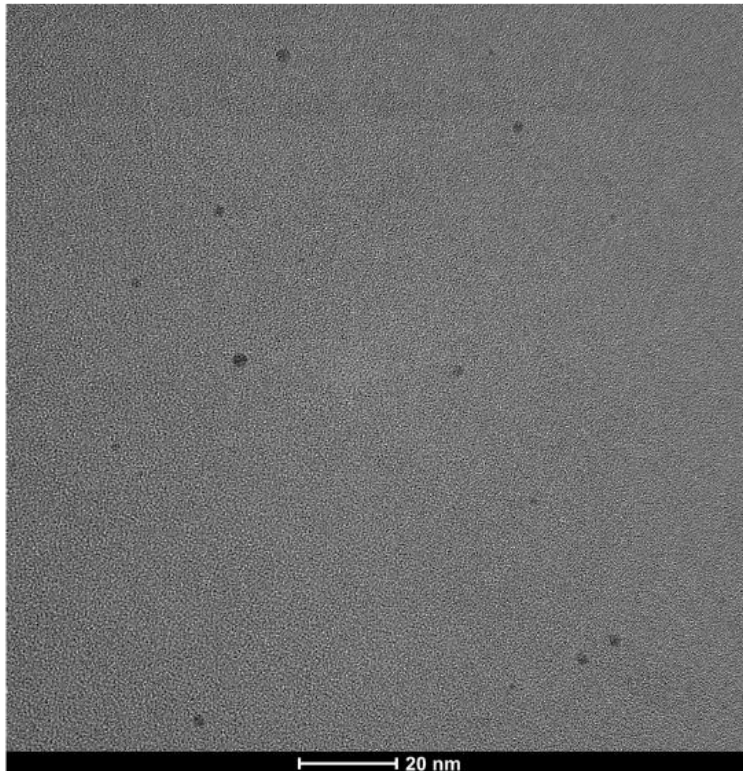

## CDs with Fluorescein

- Aggregated carbon nanoparticles
- Mean diameter of 27nm

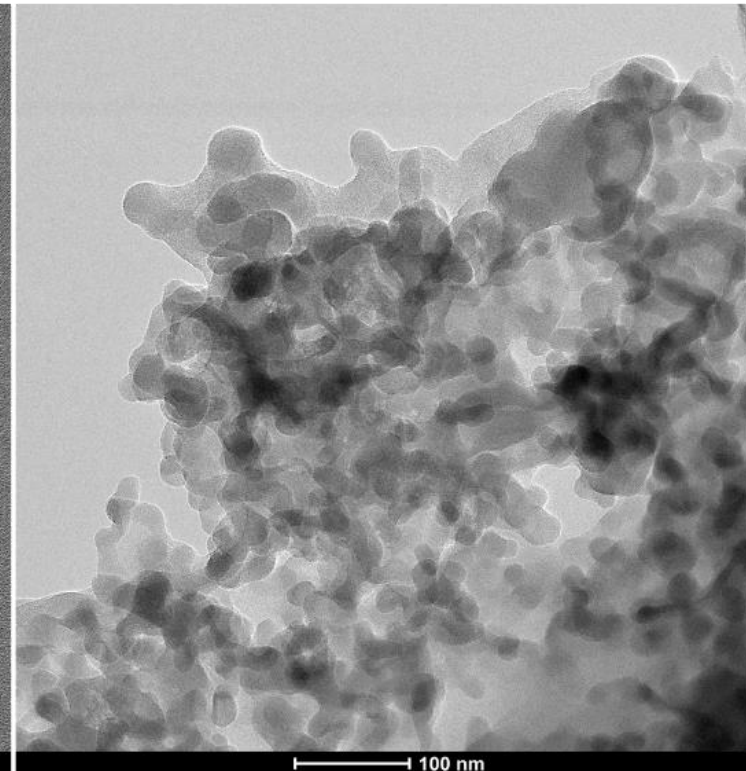

# XPS Analysis

Chemical surface composition (%)

|      |     |
|------|-----|
| C 1s | 77% |
| N 1s | 3%  |
| O 1s | 17% |

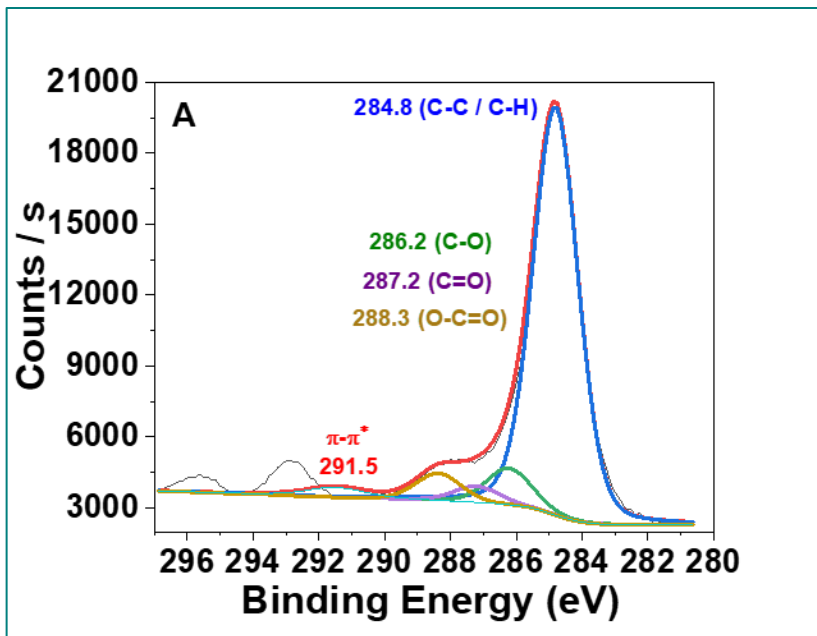

CD with Fluorescein

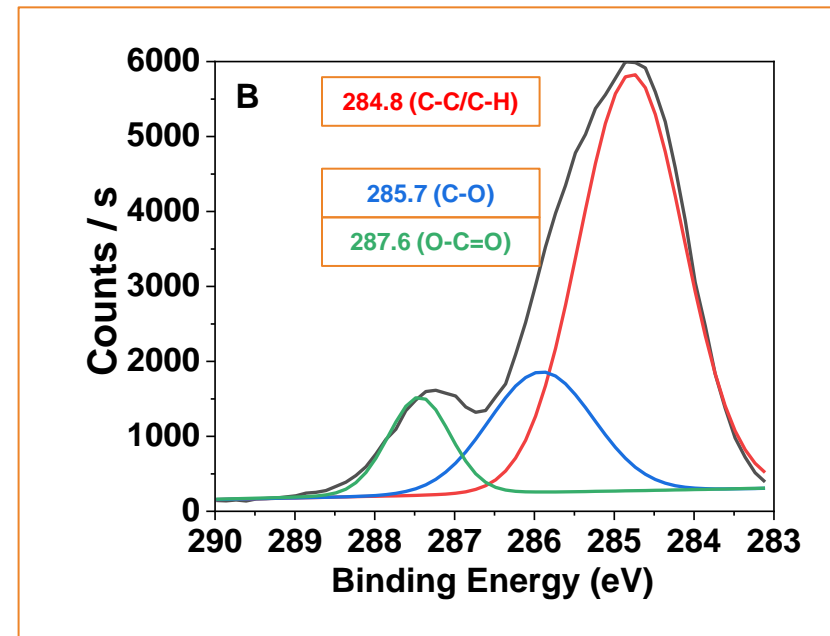

CD without Fluorescein

# UV-Vis Analysis

## Fluorescein

- Band at ~440nm in acid pH
- Red-shift to ~490nm in basic pH

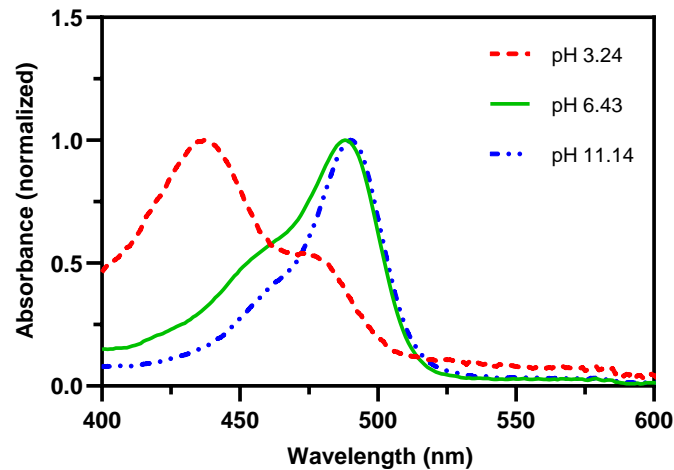

## CDs with Fluorescein

- ~500nm band formation in basic pH
- Intensity  $\propto$  pH

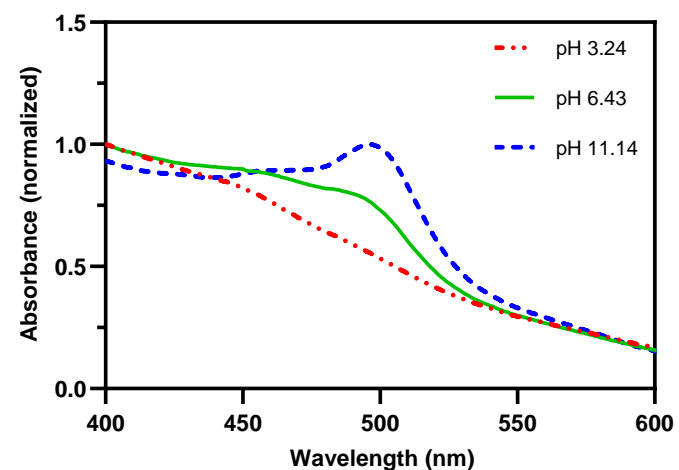

## CDs without Fluorescein

- No band at ~500nm
- No pH-sensitive response

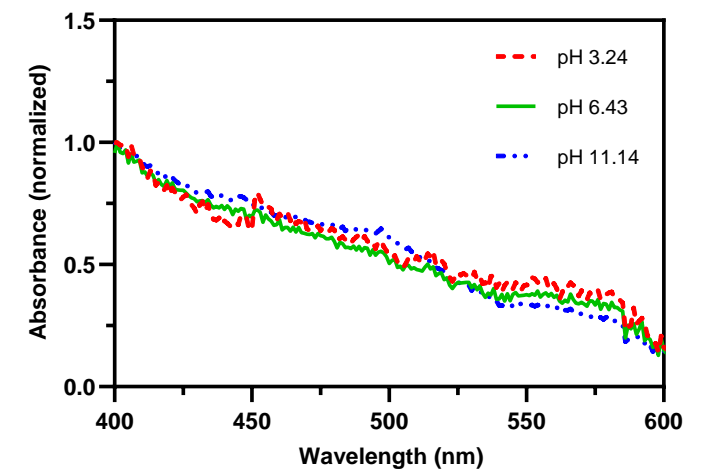



# pH-response

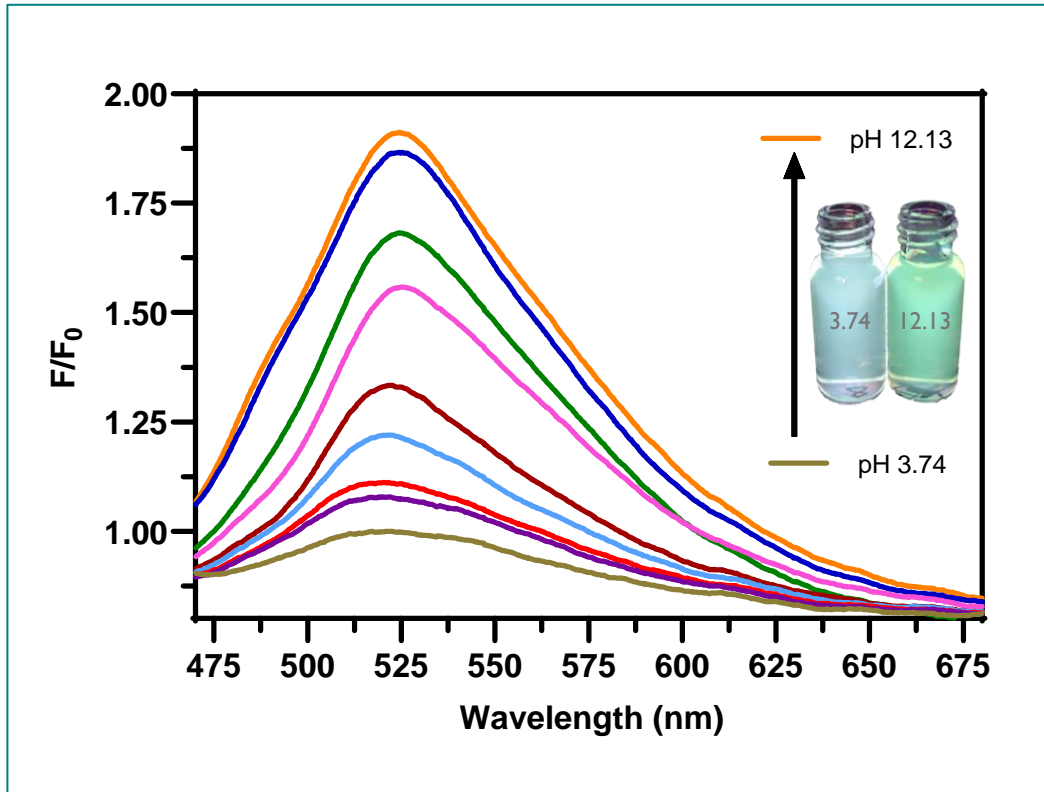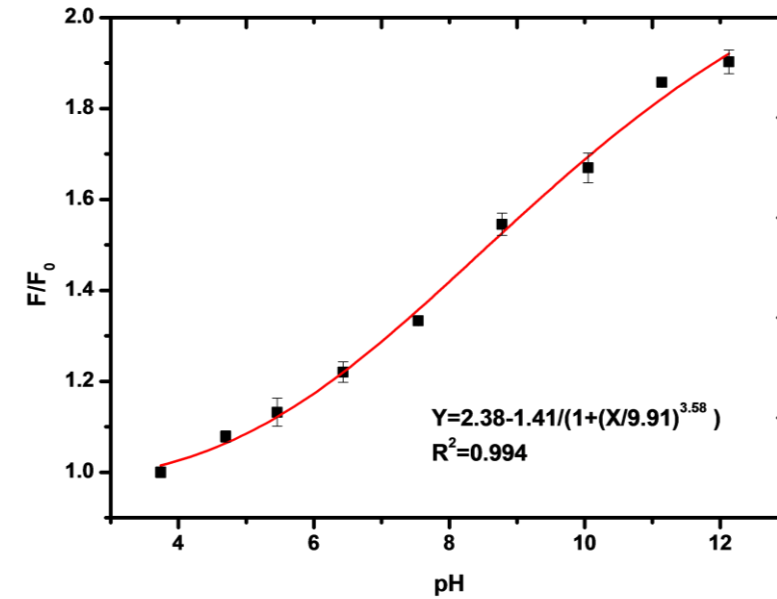

- Excitation wavelength of 450nm
- Fluorescence intensity maximum at 525nm

➤ Fluorescence enhancement with increasing pH

# pH-response

- ✓ Photostable under visible light irradiation
- ✓ Stable towards variations of the ionic strength
- ✓ Negligible effect in fluorescent intensity in the presence of interferences
- ✓ Good pH reversibility

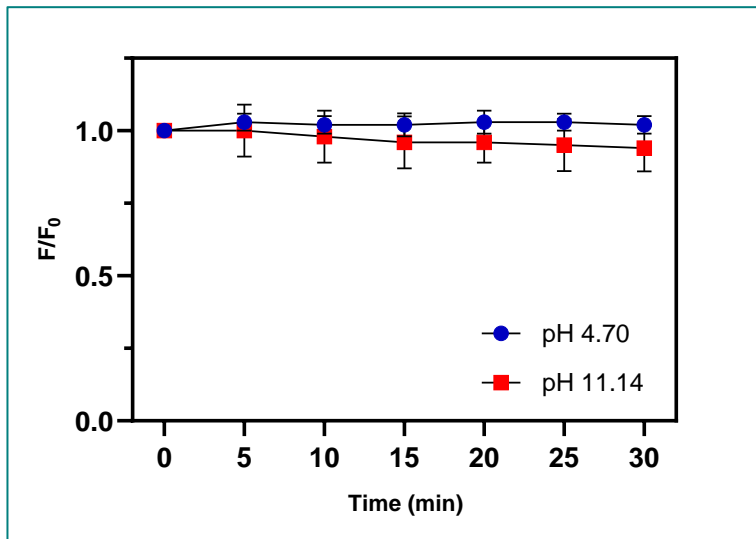

Photostability assay

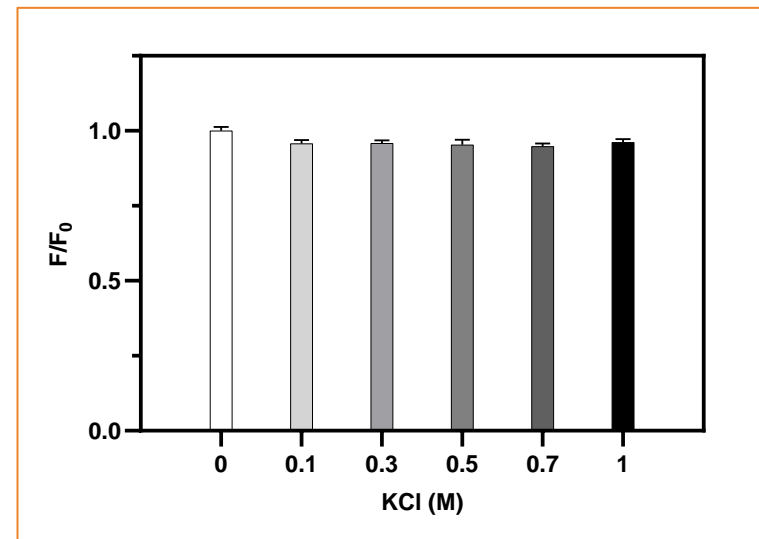

Ionic strength effect study

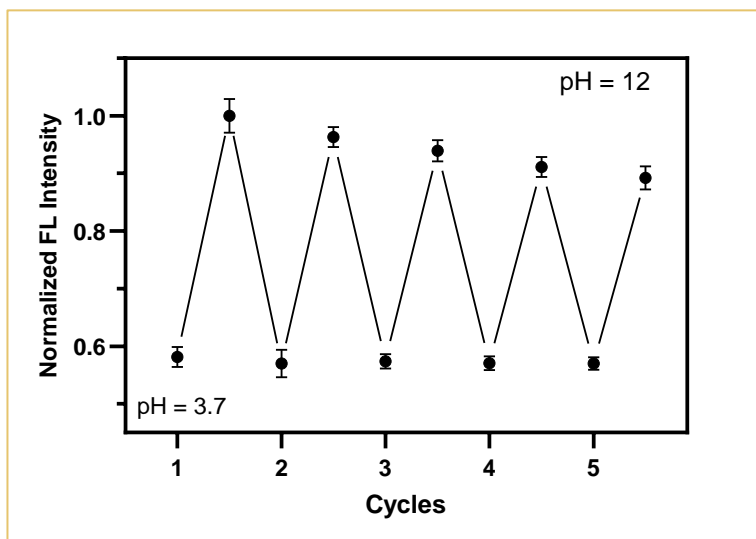

pH reversibility study

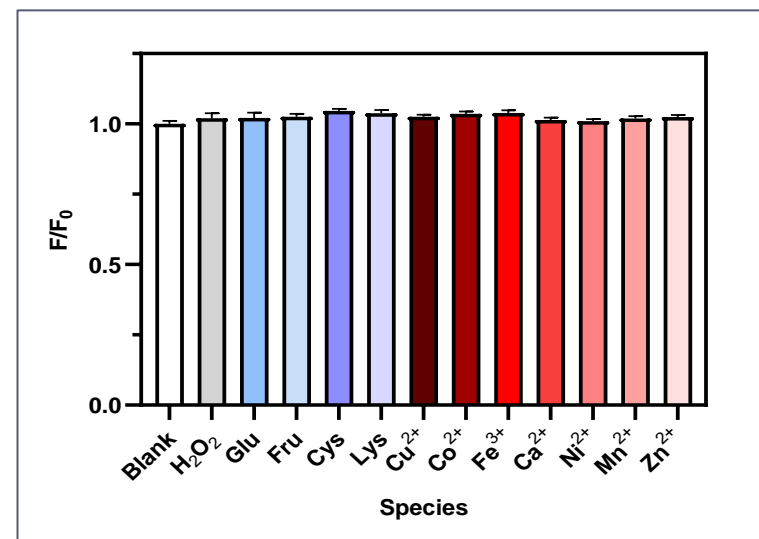

Interference study

# Real Water Samples

|                                                        | Laboratory      | Residence       |
|--------------------------------------------------------|-----------------|-----------------|
| <b>pH-meter with pH electrode</b>                      | $7.93 \pm 0.01$ | $7.99 \pm 0.05$ |
| <b>Fluorescence measurement with <math>CD_F</math></b> | $7.59 \pm 0.04$ | $7.69 \pm 0.18$ |

Samples obtained from tap water from two locations of the Porto Municipal area

# Biocompatibility

## MTT viability assay

- SH-SY5Y, Human Neuroblastoma Cell Line
- No significant drop in cell viability

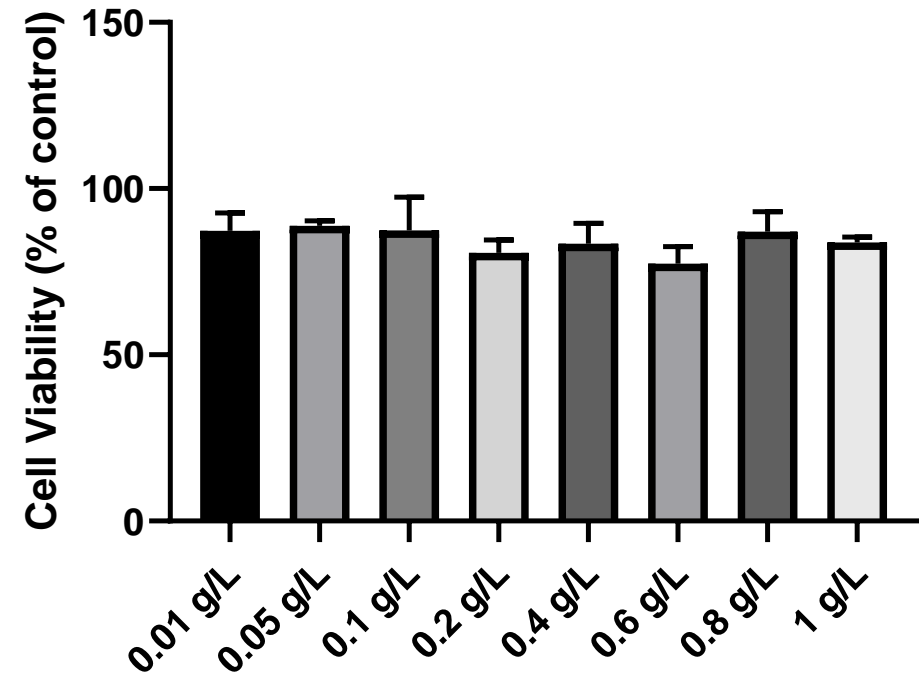

# Summing up

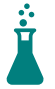

Fluorescent pH nanosensor was developed via ASP strategy

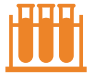

Determined pH values from 3.7 to 12.1

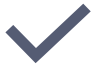

pH-selectivity, reversibility and photostability

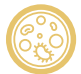

Biocompatible with human cells

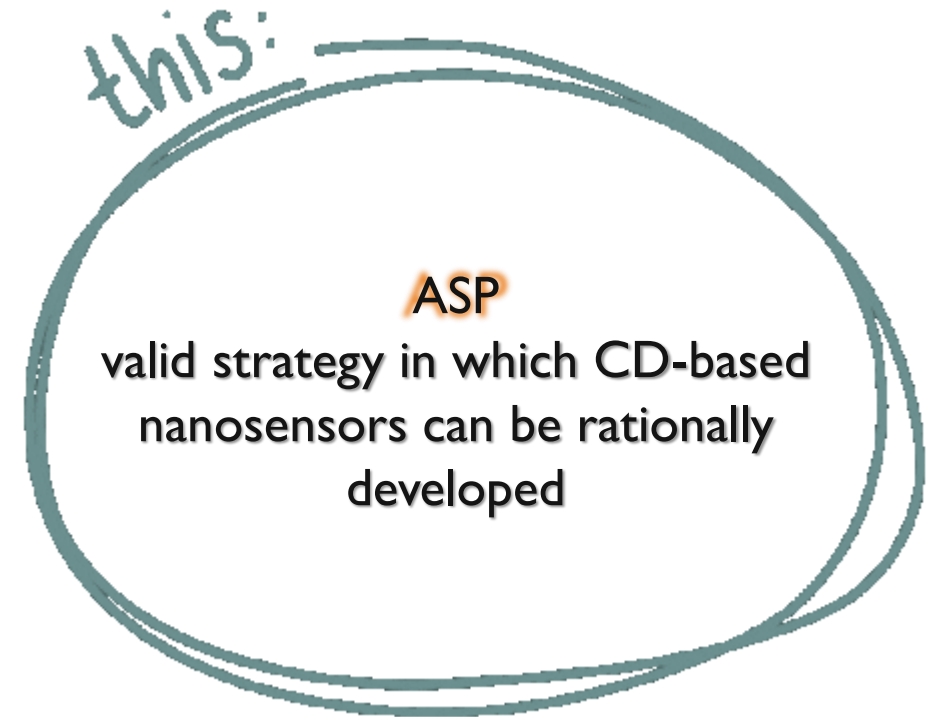

# THANK YOU FOR YOUR ATTENTION

CARBON DOTS AS A FLUORESCENCE PH NANOSENSOR BY  
APPLICATION OF AN ACTIVE SURFACE PRESERVATION STRATEGY

Ana Carolina P. Afonso

up201207846@edu.fc.up.pt

## Special thanks to my advisors:

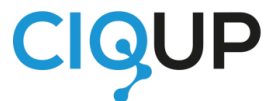

Prof. Dr. Carlos Pereira  
Dr. Luís Pinto da Silva

## Acknowledgments:

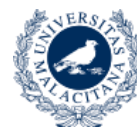

UNIVERSIDAD  
DE MÁLAGA

**Maria del Valle Martínez de Yuso, Manuel Algarra**  
HR-TEM & XPS

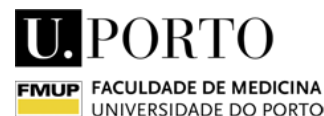

**Nuno Vale**  
MTT viability assay
